# Supplementary material for: Unusual consequences of donor and acceptor doping on the thermoelectric properties of the MgAg0.97Sb0.99 alloy
Source: Royal Society of Chemistry journal article supplement (doi:10.1039/c7ta08657a), 2018-01-01
Supplement: c7ta08657a1.pdf [file c7ta08657a1.pdf]

SUPPLEMENTARY INFORMATION

**Unusual consequences of donor and acceptor doping to  
thermoelectric properties of  $\text{MgAg}_{0.97}\text{Sb}_{0.99}$  alloys**

**Y. Liu<sup>a</sup>, D. Z. Zhou<sup>b</sup>, Y. Q. Li<sup>b</sup>, A. J. Hong<sup>b,c\*</sup>, J. H. Sui<sup>d</sup>, J. -M. Liu<sup>b</sup>, and Z. F. Ren<sup>a</sup>**

\*Correspondence and requests for materials should be addressed to A.J.H (email:6312886haj@163.com)

<sup>a</sup>*Department of Physics and TcSUH, University of Houston, Houston, TX 77204, USA*

<sup>b</sup>*Laboratory of Solid State Microstructure, Nanjing University, Nanjing 210093, China*

<sup>c</sup>*Jiangxi Key Laboratory of Nanomaterials and Sensors, School of Physics, Communication and Electronics, Jiangxi Normal University, Nanchang, China*

<sup>d</sup>*School of Materials Science and Engineering, Harbin Institute of Technology, Harbin, China*

Table SI. Carrier dopants via substitutions for  $\text{MgAg}_{0.97}\text{Sb}_{0.99}$  alloy, where D is the dopant.

| parent                        | Mg<br>( $X_e=1.31$ , 2+, $r=1.36\text{\AA}$ )                 |                              |                      | Ag<br>( $X_e=1.93$ , 1+, $r=1.34\text{\AA}$ )             |                   |              | Sb<br>( $X_e=2.05$ , 3-, $r=1.41\text{\AA}$ )      |                                        |
|-------------------------------|---------------------------------------------------------------|------------------------------|----------------------|-----------------------------------------------------------|-------------------|--------------|----------------------------------------------------|----------------------------------------|
| dopant                        | Al                                                            | Y                            | Na <sup>[2]</sup>    | Co                                                        | Ni <sup>[1]</sup> | Cd           | Pb                                                 | Self (Sb)                              |
| $X_e$                         | 1.61                                                          | 1.22                         | 0.93                 | 1.88                                                      | 1.92              | 1.69         | 2.33                                               | 2.05                                   |
| valence states                | 3+                                                            | 3+                           | 1+                   | 3+, 2+                                                    | 2+, 3+            | 2+, 1+       | 2+                                                 | 3-                                     |
| $r$ ( $\text{\AA}$ )          | 1.18                                                          | 1.62                         | 1.54                 | 1.16                                                      | 1.15              | 1.48         | 1.47                                               | 1.41                                   |
| carrier type <sup>[3]</sup>   | $n$                                                           | $n$                          | $p$                  | $n$                                                       | $N$               | $p$          | $n$                                                | $p$                                    |
| sample                        | $(\text{Mg}_{1-x}\text{D}_x)\text{Ag}_{0.97}\text{Sb}_{0.99}$ |                              |                      | $\text{Mg}(\text{Ag}_{0.97-x}\text{D}_x)\text{Sb}_{0.99}$ |                   |              | $\text{MgAg}_{0.97}(\text{Sb}_{0.99-x}\text{D}_x)$ | $\text{MgAg}_{0.97}\text{Sb}_{0.99+x}$ |
| substituting level $x$ (at %) | 0.50                                                          | 0.25<br>0.50<br>1.00<br>2.50 | 0.50<br>0.75<br>1.00 | 0.50                                                      | 0.50              | 0.50<br>1.00 | 0.25<br>0.50<br>1.00                               | 0.25<br>0.50                           |

[1] H. Z. Zhao, J. E. Sui, Z. J. Tang, Y. C. Lan, Q. G. Jie, D. Kraemer, K. N. McEnaney, A. Guloy, G. Chen, and Z. F. Ren, *Nano Energy*, 2014, **7**, 97.

[2] J. Shuai, H. S. Kim, Y. C. Lan, S. Chen, Y. Liu, H. Z. Zhao, J. H. Sui, and Z. F. Ren, *Nano Energy*, 2015, **11**, 640.

[3] The carrier type is determined primarily by electronegativity and then valence state as minor correction.

Table SII. The calculated elastic constants  $c_{11}$ ,  $c_{12}$ ,  $c_{13}$ ,  $c_{44}$  and  $c_{66}$ , bulk modulus  $B$  and shear modulus  $G$  (all in unit of GPa), Poisson's ratio  $\nu$ , Debye temperature  $\Theta_D$  (in unit of K), and Grüneisen parameter  $\gamma$  for MgAgSb compound.

|            |          |          |          |            |          |          |
|------------|----------|----------|----------|------------|----------|----------|
| Parameters | $c_{11}$ | $c_{12}$ | $c_{13}$ | $c_{33}$   | $c_{44}$ | $c_{66}$ |
| Values     | 115.62   | 37.88    | 57.86    | 96.74      | 42.04    | 26.89    |
|            |          |          |          |            |          |          |
| Parameters | $B$      | $G$      | $\nu$    | $\Theta_D$ | $\gamma$ |          |
| Values     | 70.58    | 33.82    | 0.30     | 267.44     | 1.77     |          |
